# Supplementary material for: Enhanced rate capability of a lithium ion battery anode based on liquid–solid-solution assembly of Fe2O3 on crumpled graphene
Source: Royal Society of Chemistry journal article supplement (doi:10.1039/c5ra22408j), 2016-01-01
Supplement: c5ra22408j1.pdf [file c5ra22408j1.pdf]

Electronic Supplementary Information for

# Enhanced Rate Capability of Lithium Ion Battery Anode Based on Liquid-Solid-Solution Assembly of $\text{Fe}_2\text{O}_3$ on Crumpled Graphene

*Xinghong Cui,<sup>a</sup> Yanfang Zhu,<sup>a</sup> Fei Li,<sup>c</sup> Daijun Liu,<sup>a</sup> Jianjun Chen,<sup>a</sup> Yuxin Zhang,<sup>c</sup> Li Li Zhang,<sup>b,\*</sup>  
and Junyi Ji<sup>a,\*</sup>*

<sup>a</sup> College of Chemical Engineering, Sichuan University, Chengdu, Sichuan, 610065, China.

<sup>b</sup> Institute of Chemical and Engineering Sciences, A\*STAR, 1 Pesek Road, Jurong Island  
627833, Singapore.

<sup>c</sup> College of Material Science and Engineering, Chongqing University, Chongqing, 400044,  
China.

## Corresponding Author

Junyi Ji, E-mail: [junyiji@scu.edu.cn](mailto:junyiji@scu.edu.cn)

Li Li Zhang, Email: [zhang\\_lili@ices.a-star.edu.sg](mailto:zhang_lili@ices.a-star.edu.sg)

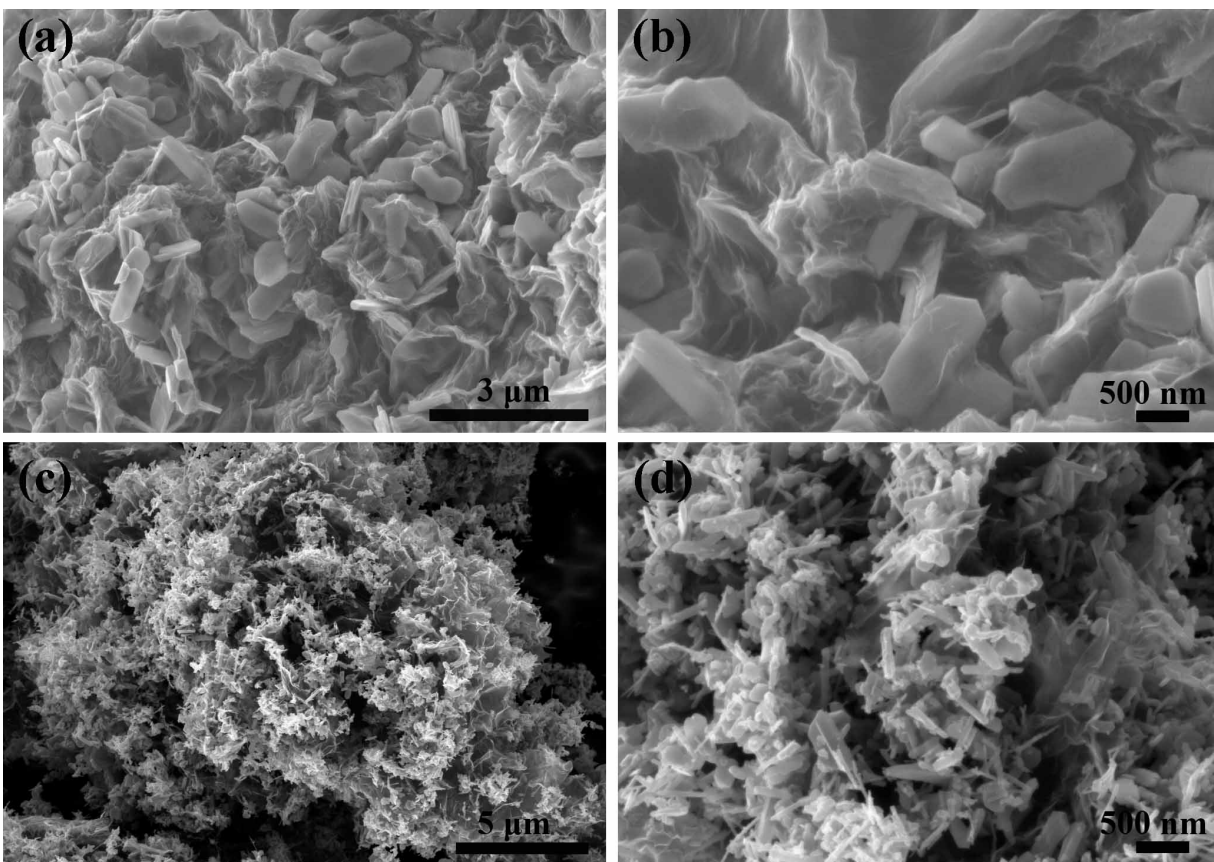

**Figure S1.** SEM images of a, b)  $\text{Fe}_2\text{O}_3@\text{rGO}$  (5:5) and c, d)  $\text{Fe}_2\text{O}_3@\text{rGO}$  (9:1) at different magnifications. The graphene sheets in  $\text{Fe}_2\text{O}_3@\text{rGO}$  (5:5) are thicker than  $\text{Fe}_2\text{O}_3@\text{rGO}$  (7:3), this may due to the higher graphene content in the composite. In contrast, the  $\text{Fe}_2\text{O}_3@\text{rGO}$  (9:1) shows  $\text{Fe}_2\text{O}_3$  aggregation on the graphene surface, which may due to the higher  $\text{Fe}^{2+}$  nucleus density during crystallization process.

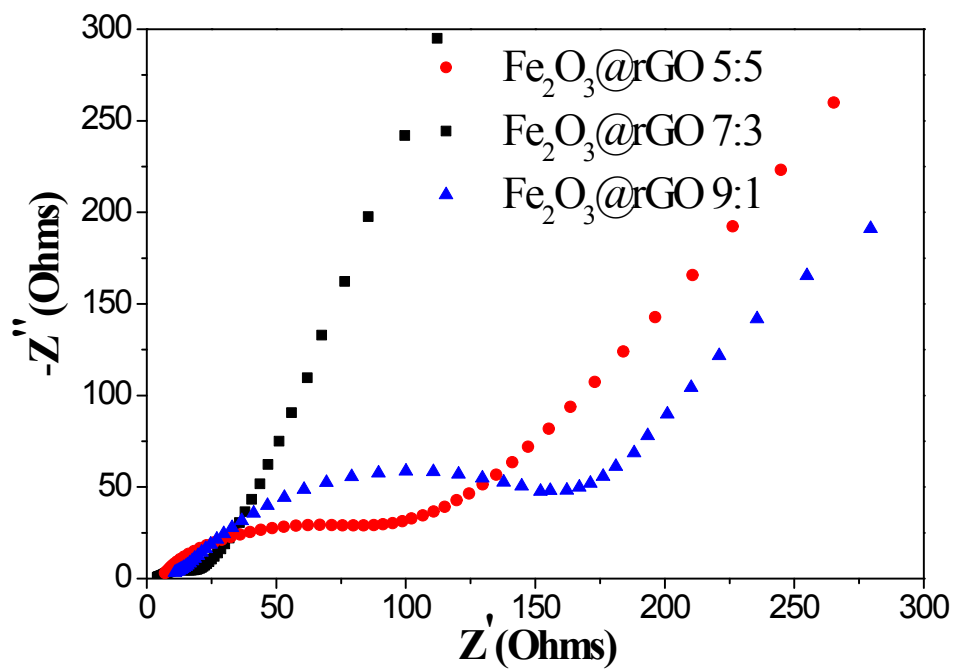

**Figure S2.** EIS of Fe<sub>2</sub>O<sub>3</sub>@rGO electrodes with various graphene amount after 20 charge-discharge cycles at 0.2 A g<sup>-1</sup>.
